# Supplementary material for: GD2-CAR NK-92 cell activity against neuroblastoma cells is insusceptible to TIGIT knockout
Source: Springer Nature journal article supplement (doi:10.1007/s00262-025-04010-6), 2025-05-03
Supplement: MOESM1 [file 262_2025_4010_MOESM1_ESM.pdf]

## Supplementary Material

**Tab. 1 List of antibodies used in this study**

| antigen  | fluorophore   | reactivity |
|----------|---------------|------------|
| PVR      | APC/Fire™ 750 | anti-human |
| PVRL2    | APC           | anti-human |
| Nectin 3 | secondary AB  | anti-human |
| Nectin 4 | APC           | anti-human |
| GD2      | BV510™        | anti-human |
| CD3      | PE/Cyanine 7  | anti-human |
| CD3      | VioBlue®      | anti-human |
| CD56     | FITC          | anti-human |
| DNAM-1   | BV421™        | anti-human |
| CTLA-4   | APC           | anti-human |
| PD-1     | BV421™        | anti-human |
| TIGIT    | APC/Cyanine 7 | anti-human |
| CD107a   | BV421™        | anti-human |

| secondary antibody  | fluorophore | clone    |
|---------------------|-------------|----------|
| goat anti-mouse IgG | APC         | Poly4053 |

| isotype control             | fluorophore   | clone    |
|-----------------------------|---------------|----------|
| Mouse IgG1, κ Isotype Ctrl  | APC/Fire™ 750 | MOPC-21  |
| Mouse IgG1, κ Isotype Ctrl  | APC           | MOPC-21  |
| REA control, human IgG1     | APC           | REA293   |
| Mouse IgG2a, κ Isotype Ctrl | BV510™        | MOPC-173 |
| Mouse IgG1, κ Isotype Ctrl  | Pe/Cyanine7   | MOPC-21  |
| Mouse IgG1, κ Isotype Ctrl  | BV421™        | MOPC-21  |
| Mouse IgG2a, κ Isotype Ctrl | APC/Cyanine 7 | MOPC-173 |

**Tab. 2 List of guide RNAs**

| target gene | guide RNA             |
|-------------|-----------------------|
| PVR         | GATGTTTCGGGTTGCGCGTAG |
| PVRL2       | GATCGGCTGGGCGGTTTAGT  |
| TIGIT       | GTCGCTGACCGTGAACGATAC |

## Supplementary Figures

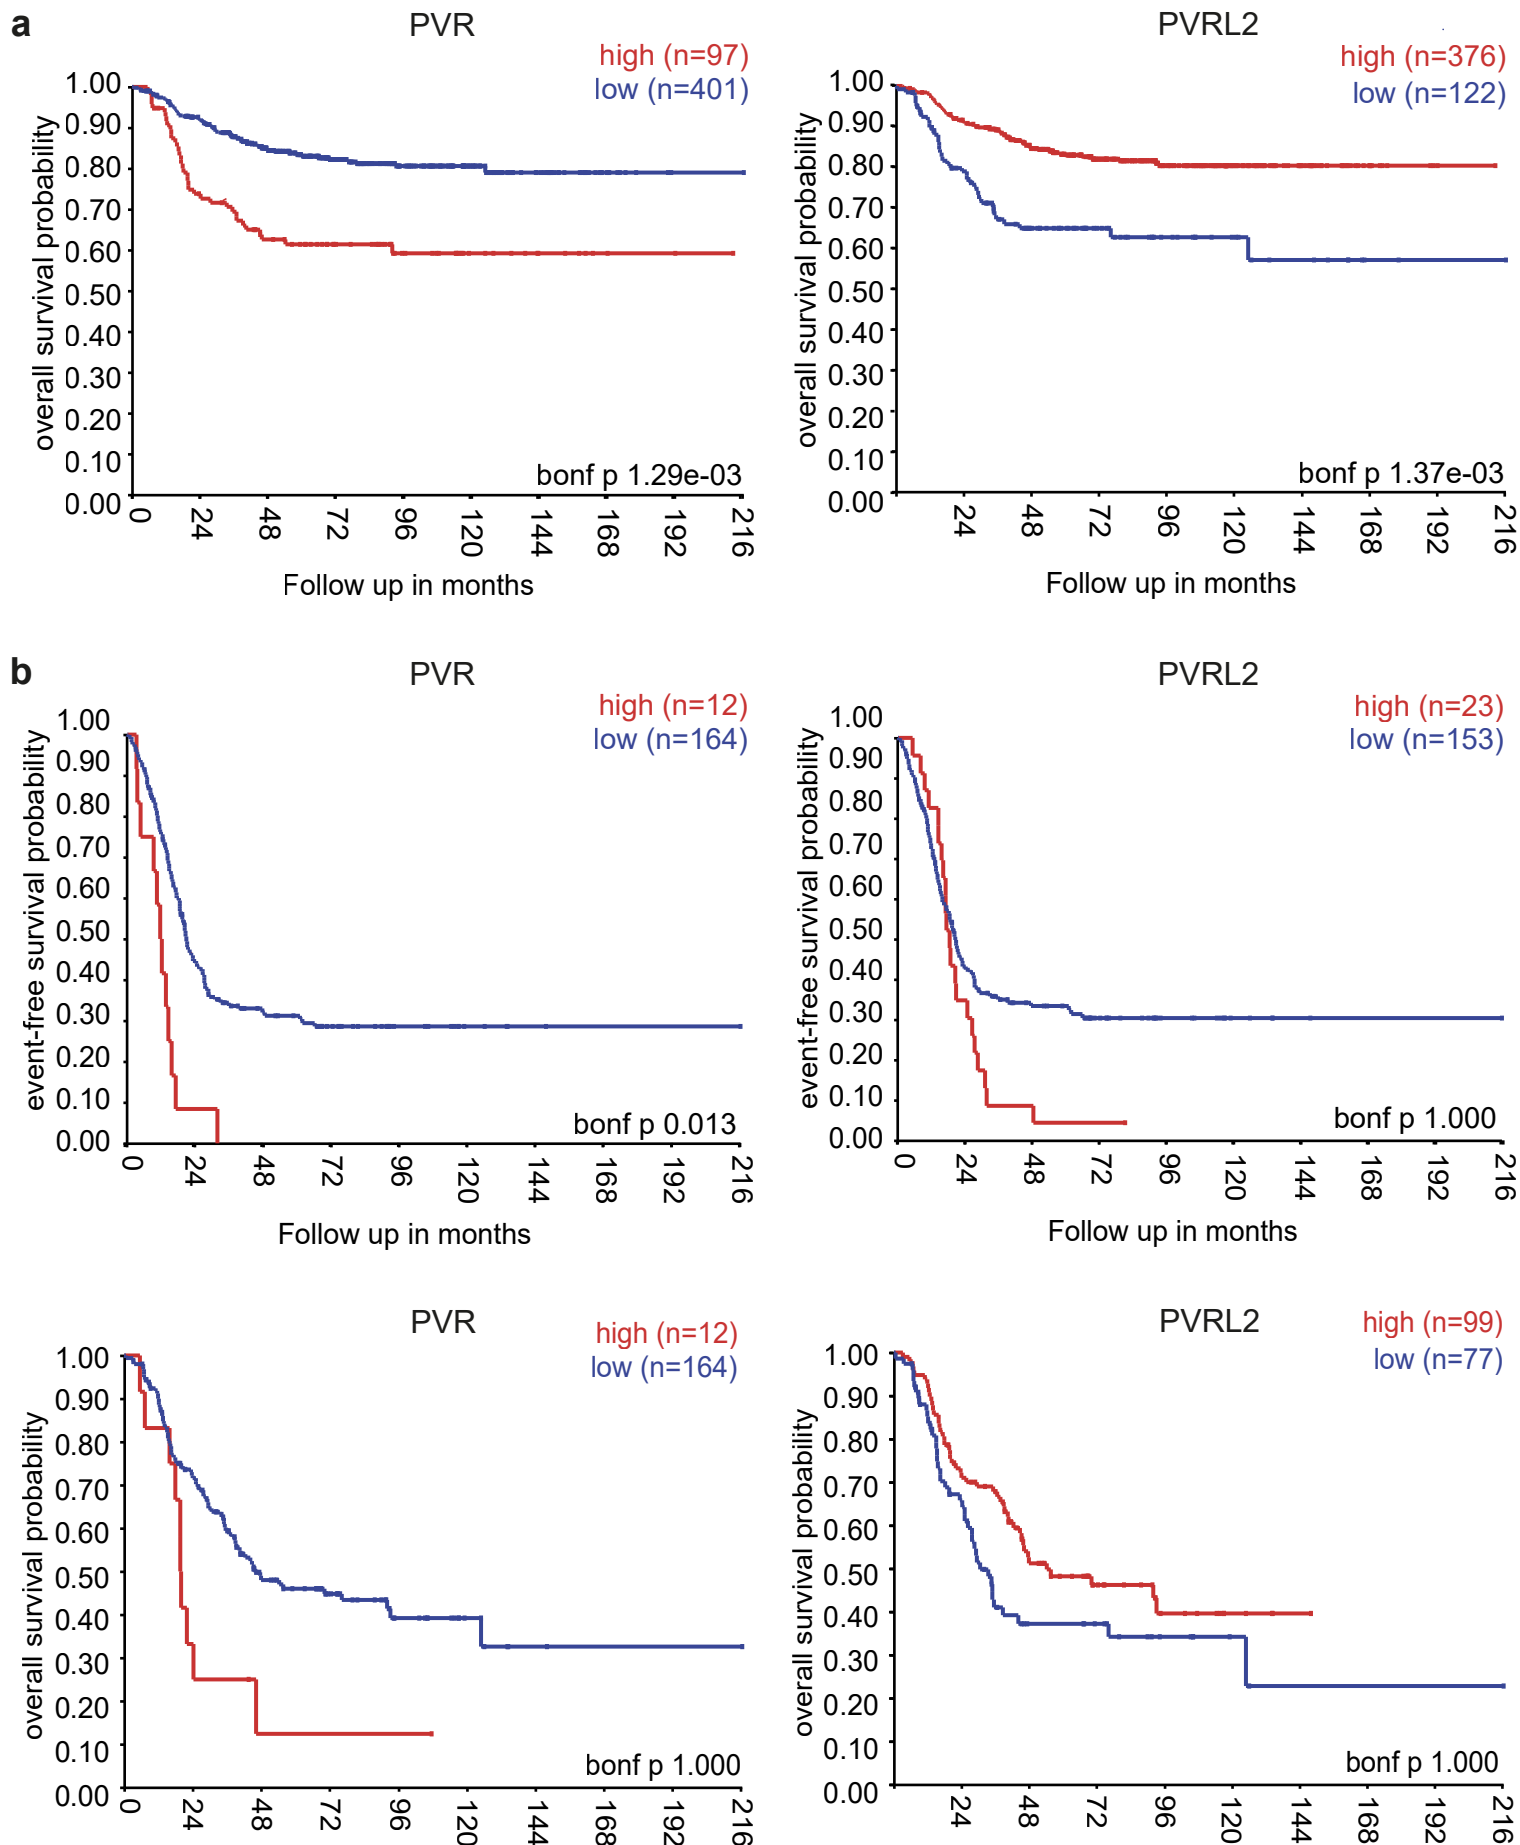

**Fig. S1 Identification of PVR and PVRL2 as potential immune checkpoint molecules**

Kaplan-Meier-Curves based on the expression of PVR and PVRL2 in primary NB samples. The curves were generated with <http://r2.amc.nl> and RNA Seq data was taken from Zhang et al., 2014.

a. Overall survival probability with high or low expression of PVR and PVRL2, all tumour stages.

b. Event-free survival probability and overall survival probability with high or low expression of PVR and PVRL2 in individuals with only high-risk tumours.

Supplementary Data

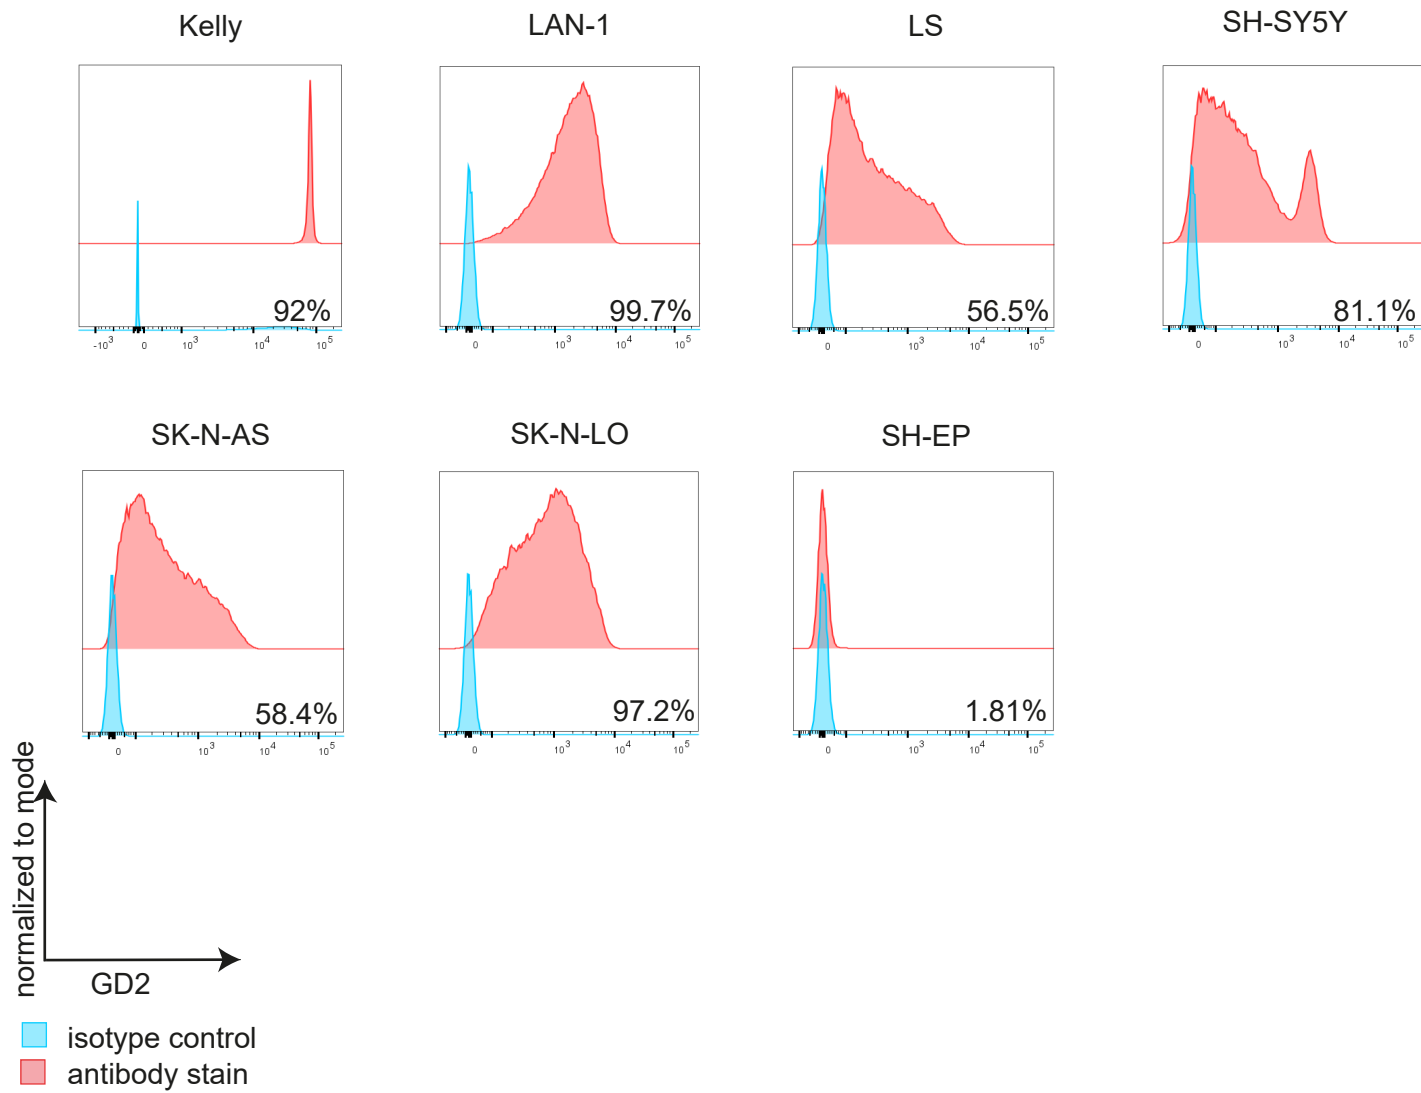

**Fig. S2 Expression of GD2 on NB cell lines**  
Surface expression of GD2 on NB cell lines Kelly, LAN-1, LS, SH-SY5Y, SK-N-AS, SK-N-LO and SH-EP. The surface expression was analysed via flow cytometry.

## Supplementary Data

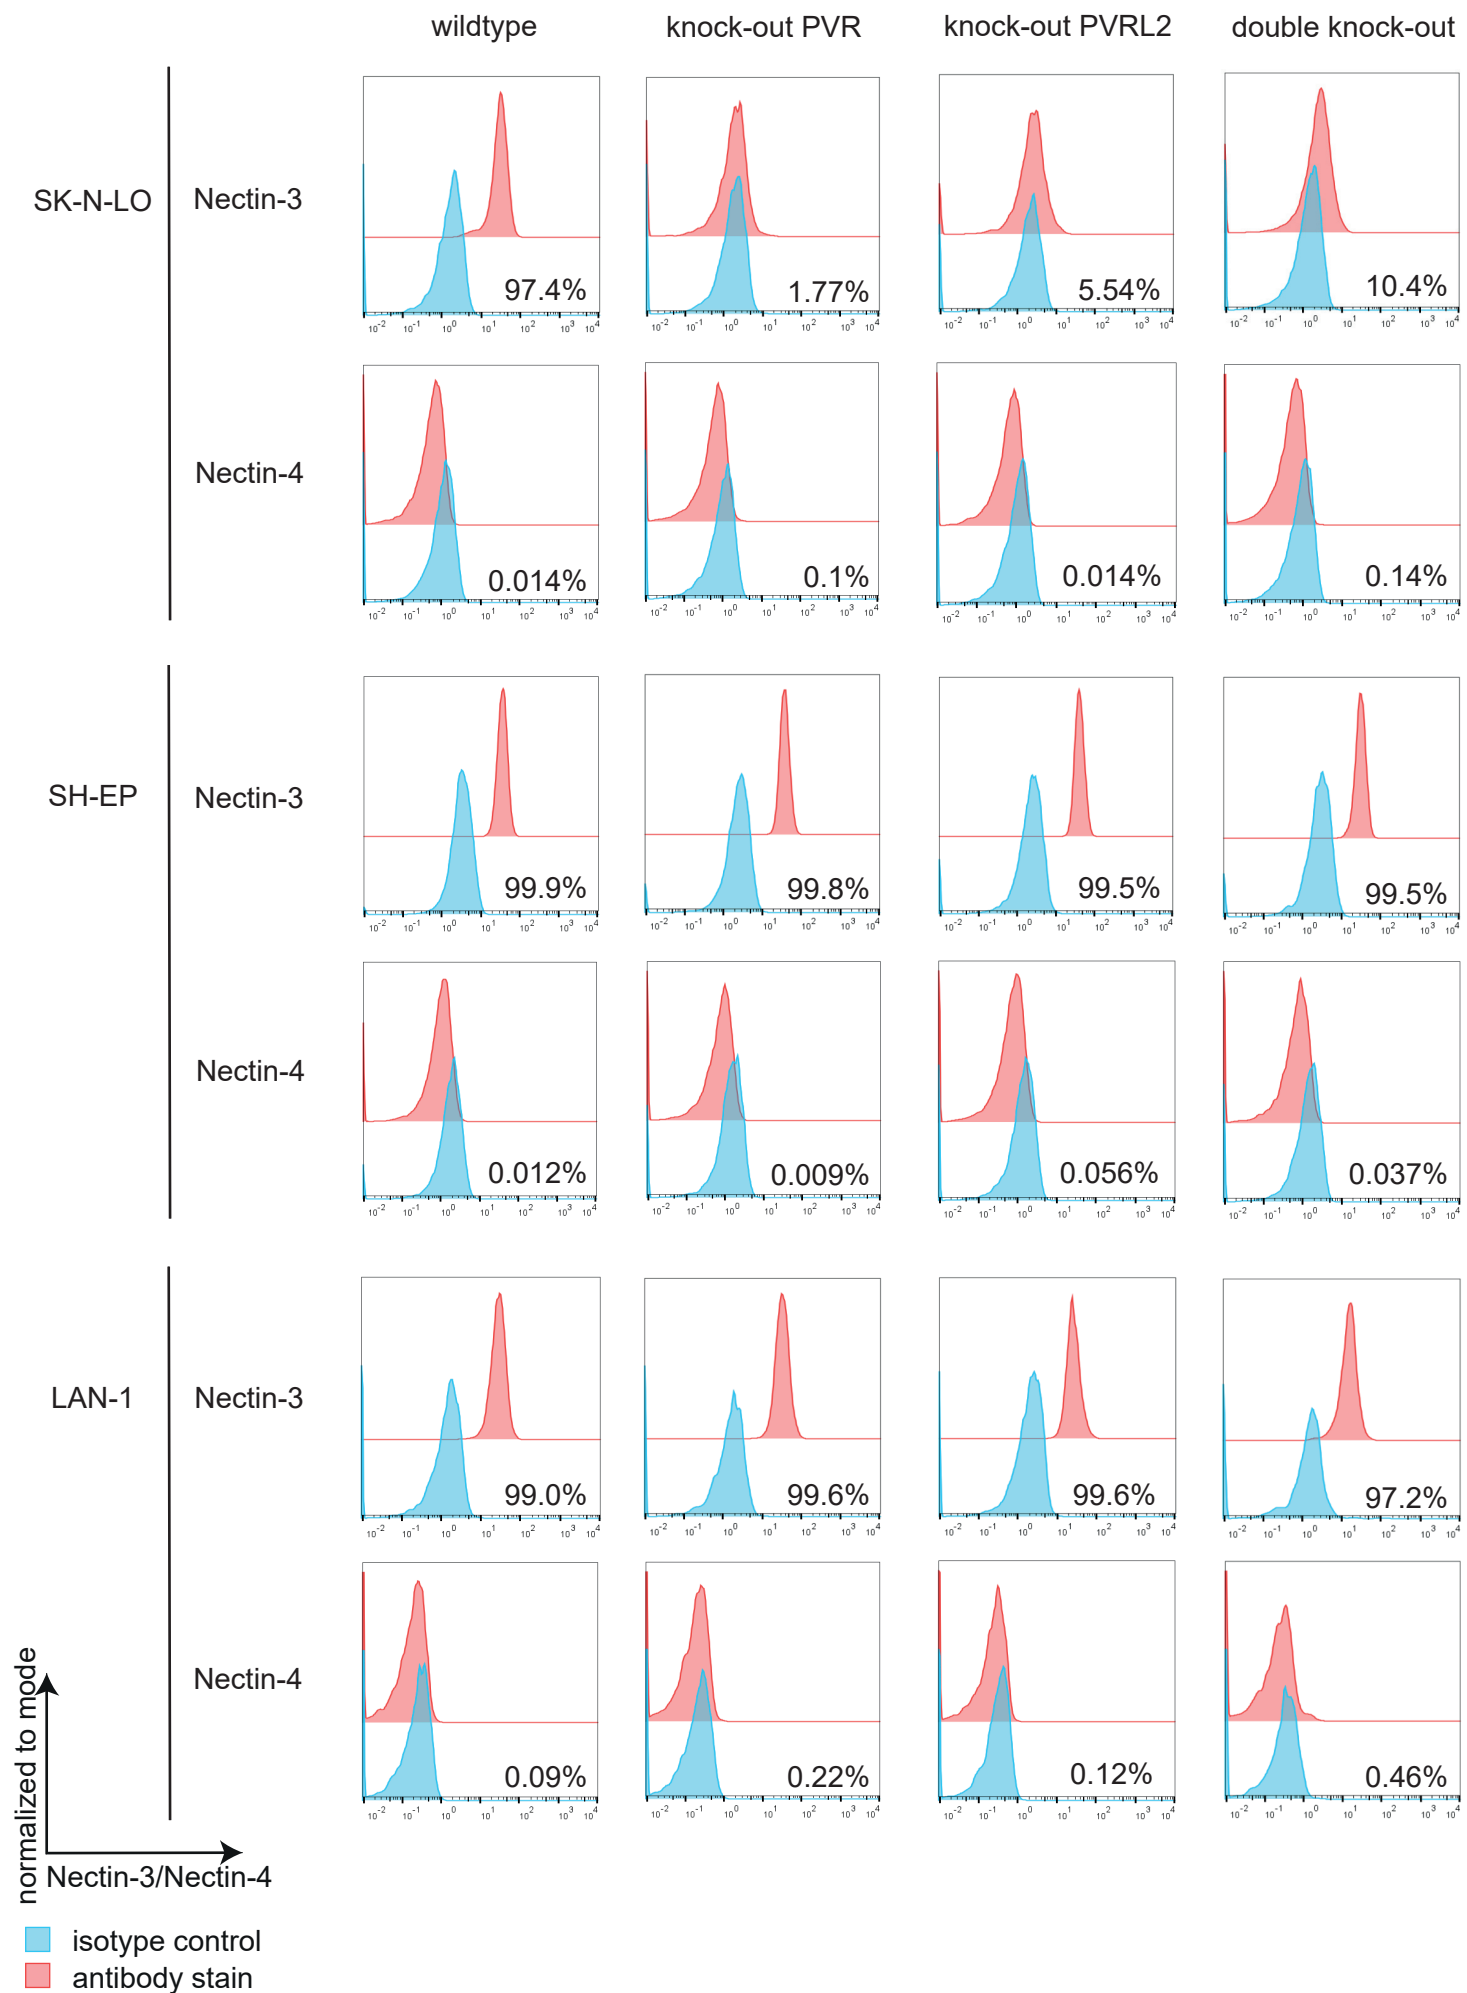

**Fig. S3 Surface expression of TIGIT binding receptors Nectin-3 and Nectin-4**

Surface expression of Nectin-3 and Nectin-4 on PVR and PVRL2 wildtype and knockout cell lines SK-N-LO, SH-EP and LAN-1. The surface expression was analysed via flow cytometry after antibody staining and staining with the corresponding isotype control. Shown is one representable sample from n=3 experiments.

## Supplementary Data

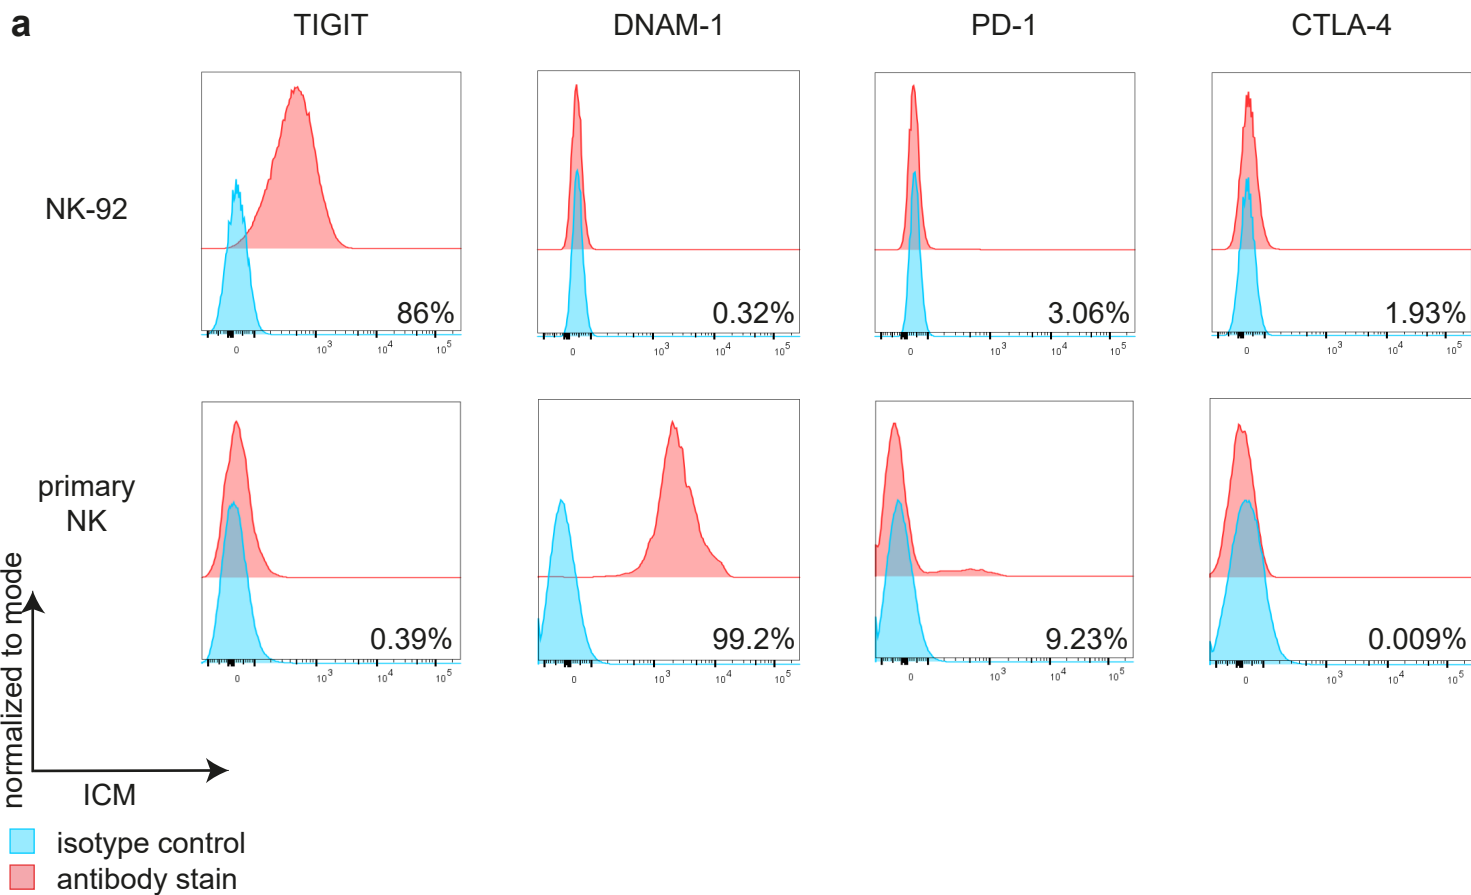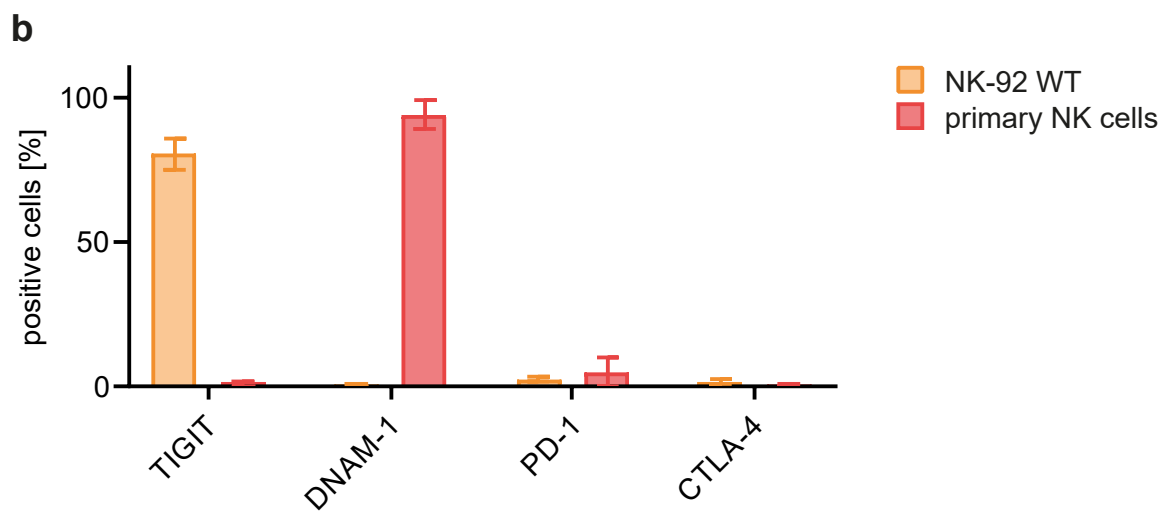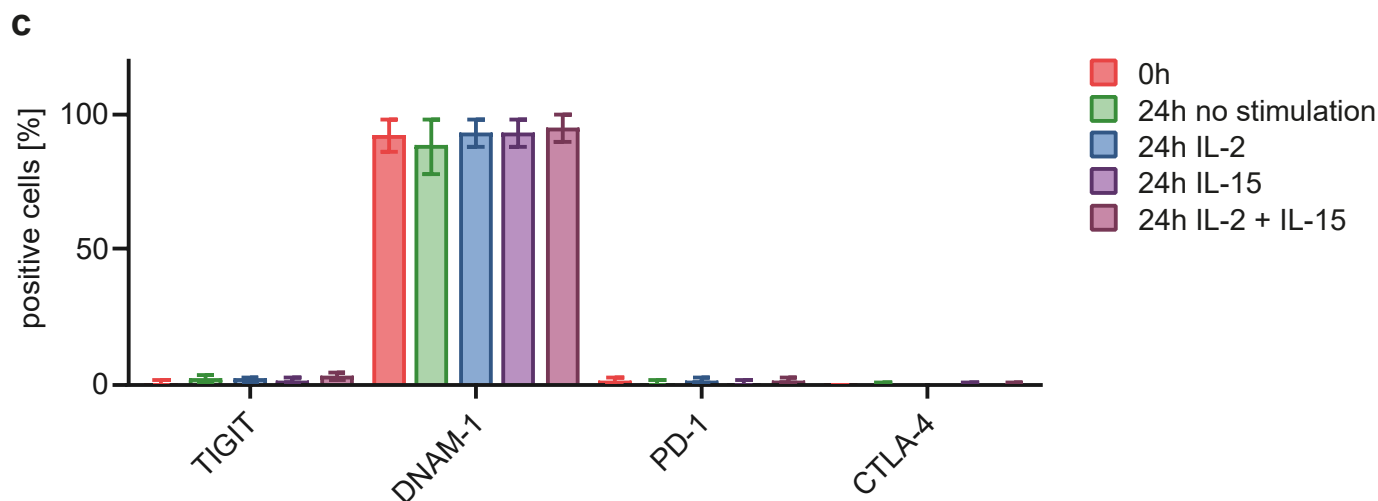

**Fig. S4 Identification of PVR/PVRL2 – interaction partners on NK-92 effector cells**

a. Surface expression of immune checkpoint molecules on primary NK cells and NK-92 cells analysed via flow cytometry. Shown is one representative sample.

b. Results from all experiments (NK-92 n=3, primary NK cells n=6).

c. Surface expression of IC molecules after stimulation of pNK cells with IL-2, IL-15 or IL2/IL-15 for 24 hours.

## Supplementary Data

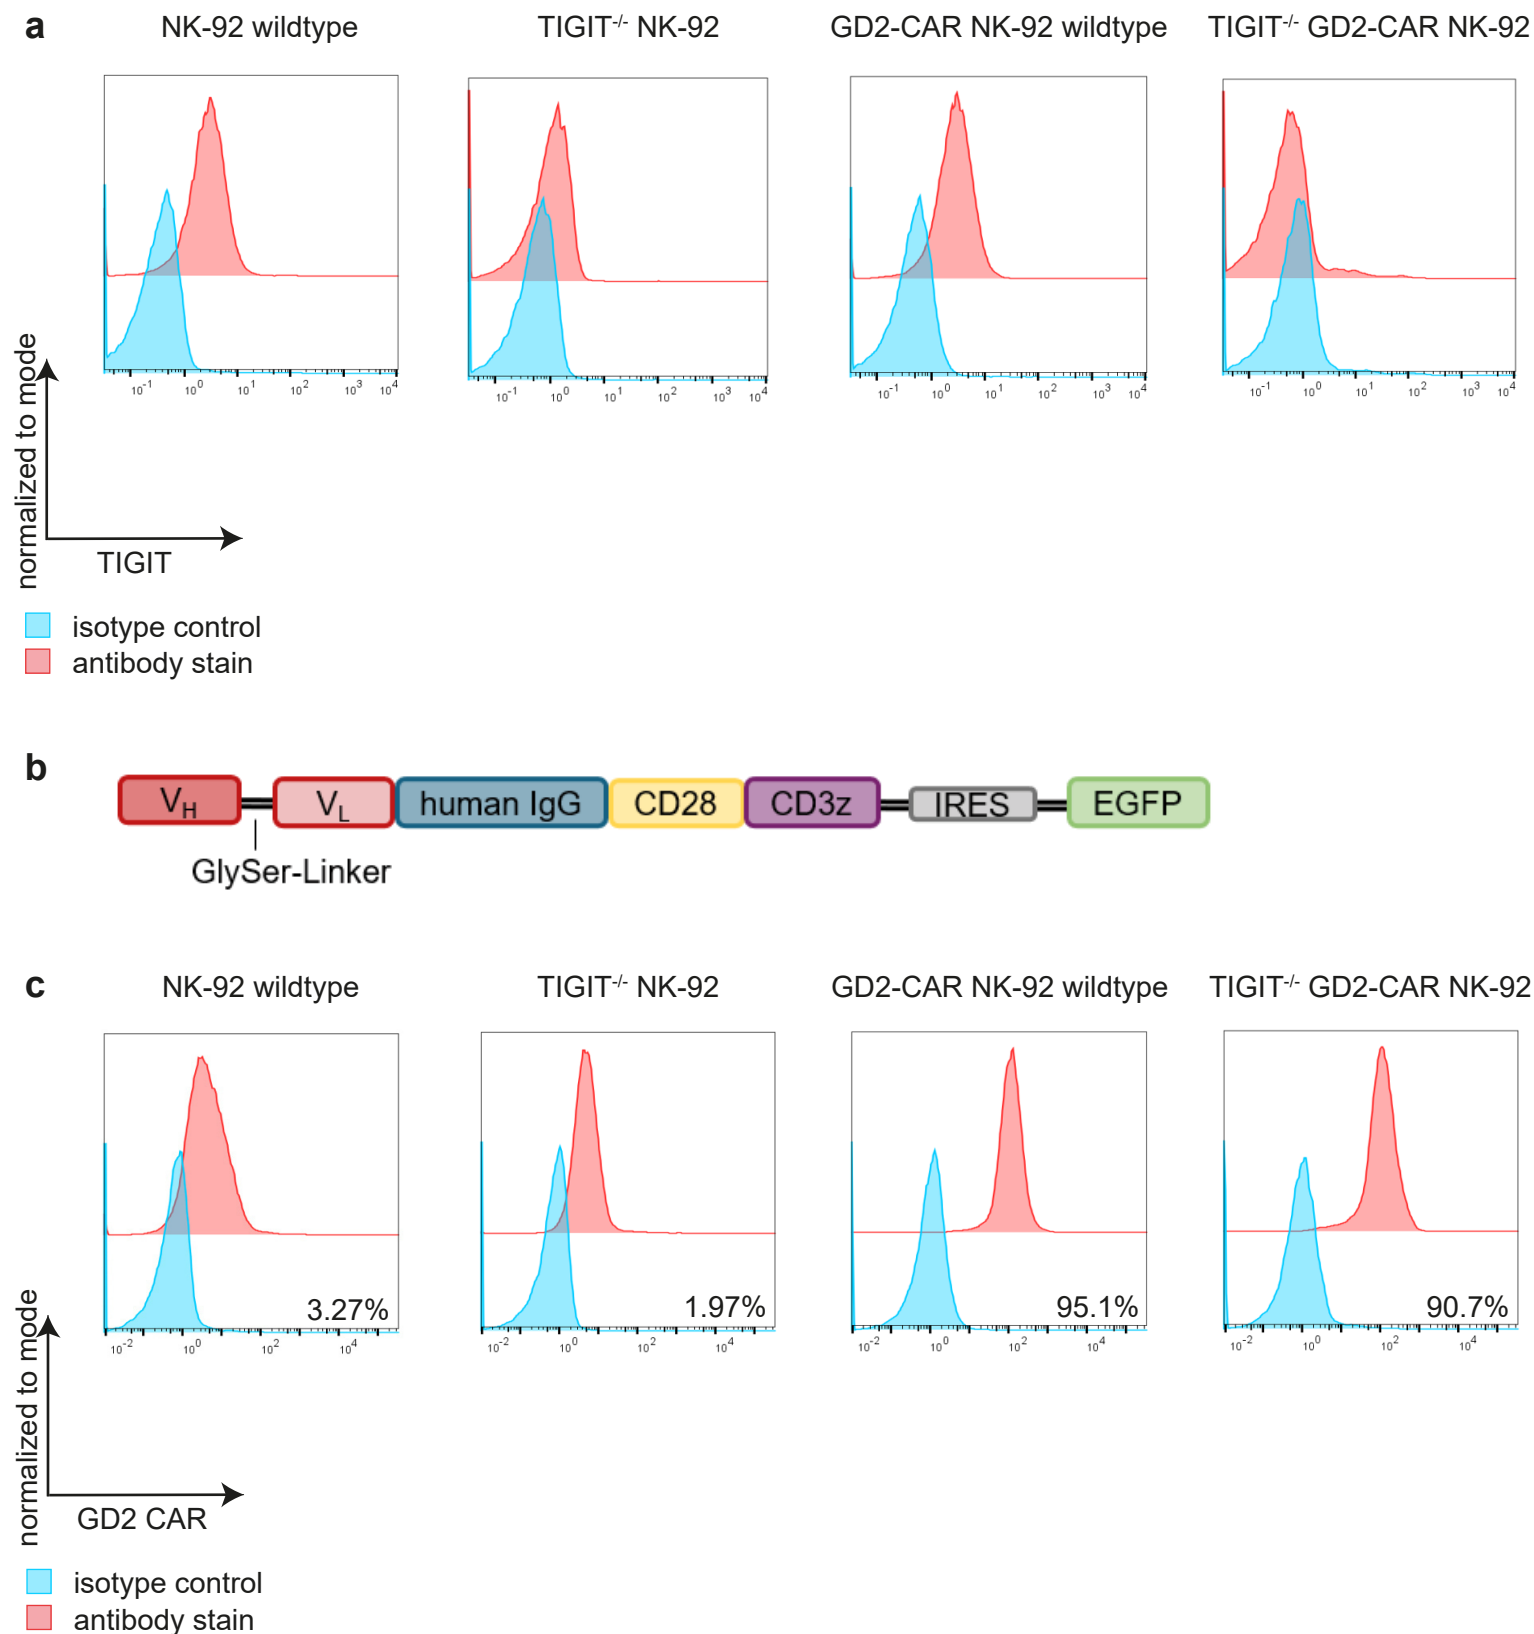

**Fig. S5 Generation of TIGIT<sup>-/-</sup> NK-92, GD2-CAR NK-92 (wildtype) cells and TIGIT<sup>-/-</sup> GD2-CAR NK-92 cells**

- Flow cytometry screening of TIGIT on NK-92 cells pre and post knock-out. As controls, unstained samples and samples stained using the corresponding isotype were used.
- Schematic representation of the GD2-CAR vector.
- Surface staining of transduced NK cells on GD2-CAR expression using biotinylated protein L and Streptavidin-APC/Cyanine 7. As controls, the corresponding isotype was used.

Supplementary Data

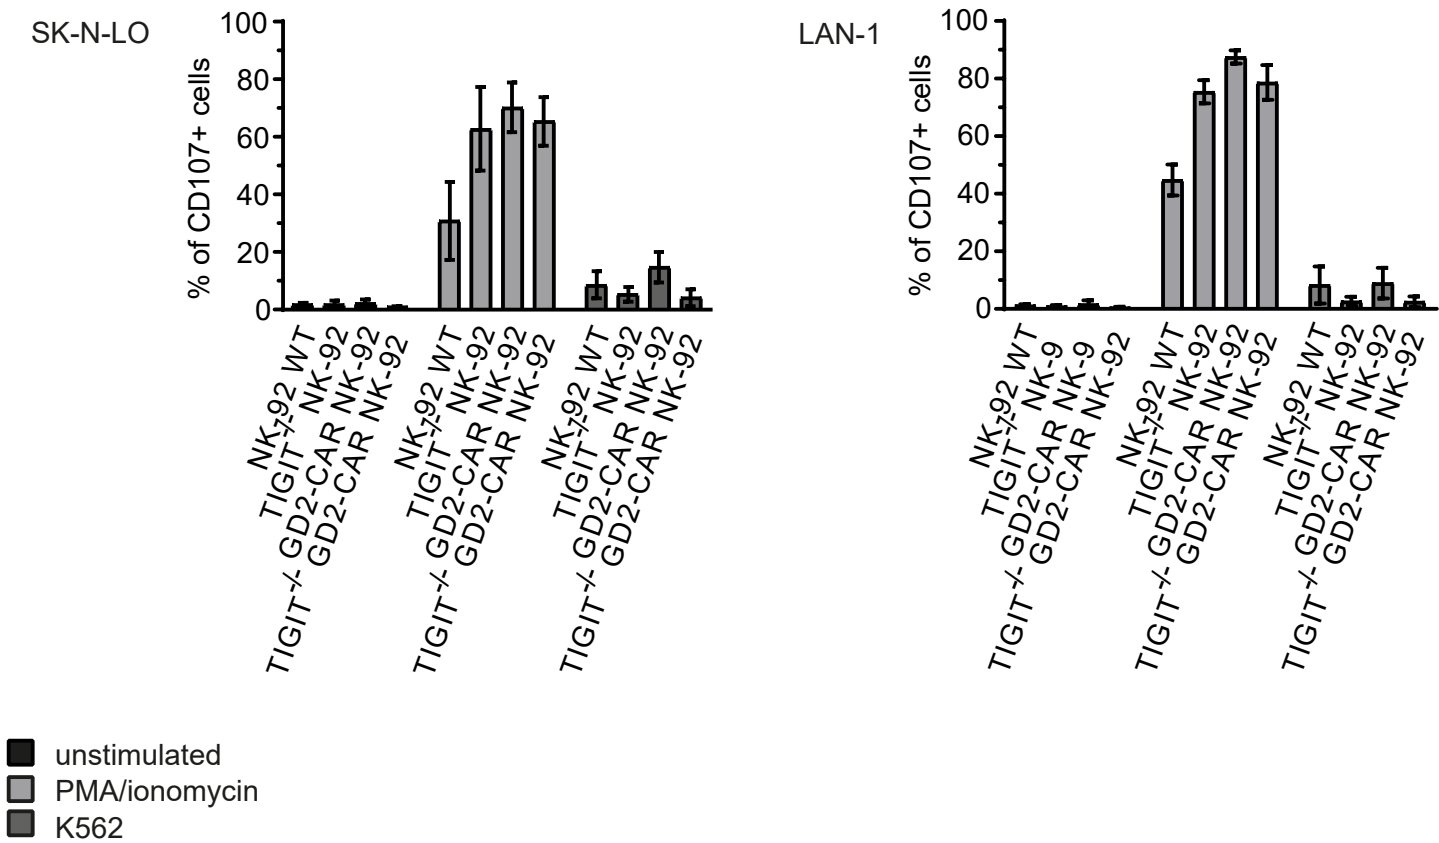

**Fig. S6 Controls of degranulation assays using NK-92 effector cells and NB cell lines**  
Control assays using unstimulated cells, PMA/ionomycin treated cells and NK-92 co-cultured with K562 (n=3). Error bars showing the standard deviation of triplicates of three assays.  $p < 0.05$ ,  $p < 0.01$ ,  $p < 0.001$  or  $p < 0.0001$  were indicated by \*, \*\*, \*\*\* or \*\*\*\* respectively.
